1  
2  
3  
4  
5  
6  
7  
8  
9  
10  
11  
12  
13  
14  
15  
16  
17  
18  
19  
20  
21

## TITLE PAGE

Changing temporal trends in patient volumes in a pediatric emergency department during  
a COVID-19 pandemic lockdown: a retrospective cohort study.

1<sup>st</sup> Author: Paul C. Mullan, MD, MPH; Children’s Hospital of the King’s Daughters,  
Department of Pediatrics, Division of Pediatric Emergency Medicine,  
Eastern Virginia Medical School.

2<sup>nd</sup> (Last) Author: Turaj Vazifedan, MS; Children’s Hospital of the King’s Daughters,  
Department of Pediatrics,

Corresponding Author: Paul C. Mullan –

Corresponding Author Email: [paul.mullan@chkd.org](mailto:paul.mullan@chkd.org); Phone +1-713-855-4827.

22 **ABSTRACT**

23

24 Objective:

25 Emergency department (ED) teams have had to adjust limited staffing resources to meet  
26 the fluctuating levels of patient volume and acuity during the COVID-19 pandemic.

27 Historically, Mondays have had the highest reported ED volumes. We are unaware of any  
28 studies reporting on the change of this Monday effect during the COVID-19 pandemic.

29

30 Methods:

31 This retrospective, observational study of a single pediatric ED compared a pandemic  
32 lockdown period (3/23/2020-11/1/2020) with a seasonally comparative period (3/25/2019-  
33 11/3/2019). We compared the mean number of patients who arrived on Monday versus  
34 any other specific weekday (Tuesday, Wednesday, Thursday, or Friday) and the  
35 aggregate of other weekdays (Tuesday to Friday) for both study periods. Secondary  
36 analyses investigated overall mean volumes, admission rates, and differences in triage  
37 acuity levels.

38

39 Results:

40 There were 31,377 and 18,098 patients in the comparative and pandemic periods. The  
41 mean number of ED visits on Mondays in the comparative period was significantly more  
42 than any other weekday and the aggregate of weekdays (latter  $p < 0.001$ ). In contrast, there  
43 were no significant differences in the mean number of ED visits on Mondays in the  
44 pandemic period relative to any other weekday and the aggregate of weekdays (all  
45  $p > 0.05$ ). The pandemic period had significantly lower mean volumes, higher admission  
46 rates, and more patients with higher acuity levels.

47 Conclusion:

48 The previously experienced Monday effect of increased relative ED patient volumes was  
49 not seen during the pandemic period. This change has operational implications for  
50 scheduling ED staffing resources. Larger database studies are needed to determine the  
51 generalizability of these findings.

52

53

54

55

56

57

58

59

60

61

62

63

64

65

66

67

68

69

## 70 INTRODUCTION

71 Understanding temporal trends in the volume of patients arriving at emergency  
72 departments (EDs) is critical in the operational planning of resources during this period of  
73 the coronavirus disease (COVID-19) pandemic as well as during non-pandemic periods.  
74 By predicting the anticipated ED staffing needs according to the hour of the day, day of the  
75 week, or month of the year, leadership can appropriately determine staff rosters, offer  
76 surge moonlighting opportunities, flex rooming areas, and plan financial budgets. Optimal  
77 planning of these resources can support ED care that is timely, efficient, safe, and  
78 effective. Prior studies have identified other temporal factors that were associated with  
79 changes in ED patient volumes including seasonality, day of the week, time of day, and  
80 holidays.<sup>1,2</sup>

81 The initial spread of the novel severe acute respiratory syndrome coronavirus  
82 (SARS-CoV-2) to the United States (U.S.) in early 2020, and the resulting pandemic that  
83 followed, led to lockdowns with the closure of schools and daycare facilities. These  
84 lockdowns were associated with significant decreases in patient volumes in U.S. adult and  
85 pediatric emergency departments.<sup>3-5</sup> In one U.S. based, multi-center ED study, this  
86 lockdown period was associated with significant ED revenue decreases that led to a 15%  
87 reduction in ED physician hours when compared to a pre-pandemic period.<sup>6,7</sup> Given the  
88 economic vulnerability of U.S. EDs, which are primarily reimbursed on a fee-for-service  
89 model, it is critical that ED staff scheduling can anticipate temporal changes in patient  
90 volumes.

91 Higher volumes of ED patients have been historically been reported to occur on  
92 Mondays.<sup>8-10</sup> Given this trend, we have historically scheduled additional physician and  
93 nurse staffing coverage on Mondays to manage the workload. This study aims to  
94 characterize the weekday variability in patient volume in a U.S. pediatric emergency

95 department during a pandemic period and a comparative pre-pandemic period. We  
96 hypothesize that there was a significantly higher proportion of ED weekday patient  
97 volumes on Mondays in the pre-pandemic period and that this difference was no longer  
98 present during the pandemic period.

99

## 100 **MATERIAL AND METHODS**

### 101 Study design and setting

102 This study was a retrospective, observational cohort study of ED visits at a 31-bed  
103 freestanding, academic children's hospital. This hospital is the state's only dedicated  
104 Level-I pediatric trauma center and the only freestanding children's hospital in the state,  
105 with a catchment area population of approximately two million people. This report was  
106 written according to the Strengthening The Reporting of Observational Studies in  
107 Epidemiology guideline statement.<sup>11</sup>

### 108 Methods and measurements

109 The patients were identified with a patient report generated from our electronic  
110 health record. Each patient was designated as arriving on a particular day of the week  
111 based on the patient's ED arrival time.

112 The study period was evaluated based on historical events. The first reported  
113 SARS-CoV-2 infection in Virginia was on March 7, 2020 and the governor declared a state  
114 of emergency on March 12, 2020 to start public health interventions aimed to change  
115 behaviors and limit the infectious spread of SARS-CoV-2.<sup>12</sup> The governor closed schools  
116 statewide on Monday, March 23, 2020 for the academic school year through to June 2020;  
117 the majority of schools in the region and state remained fully remote in the Fall of 2020.<sup>13</sup>  
118 The first surge in COVID-19 cases in the region occurred in July and August 2020; the  
119 second surge started in November 2020. This study's pandemic period of analysis was a  
120 period of 32 weeks (3/23/2020-11/1/2020) from the initial school closures until the second

121 surge when more in-person schooling started to become available. This pandemic period  
122 was compared with a seasonally comparative period in 2019 (3/25/2019-11/3/2019). All  
123 ED patients from both periods were eligible for inclusion.

#### 124 Outcomes and Analyses

125 The primary outcome was to determine if there was a difference in the proportion  
126 of weekday patients who arrived on a Monday versus another weekday in each study  
127 period. For the primary outcome, Generalized Linear Model (GLM) was conducted for  
128 comparing the mean number of all ED visits on Mondays versus the mean number of all  
129 ED visits on each of other weekdays (that is, Monday versus Tuesday; Monday versus  
130 Wednesday; Monday versus Thursday; Monday versus Friday) and in aggregate (that is,  
131 Monday versus Tuesday-through-Friday) during the two study periods in 2019 and 2020. A  
132 box plot was created to graphically display all ED visit numbers in each period.

133 Secondary analyses used GLM for comparing the Emergency Severity Index (ESI)  
134 triage level proportions between the 2019 and 2020 periods; any patients without an  
135 assigned ESI level were excluded from this analysis. Continuous variables were presented  
136 as mean and Standard Deviation (SD). Categorical variables were presented as frequency  
137 and percentage. A Chi-square test was used for comparing the percentage of ED visits  
138 that arrived on a weekday versus a weekend day of the week between 2019 and 2020. All  
139 statistical tests were performed using SPSS 26 (Chicago, IL). All statistical tests were two-  
140 sided, and  $p < 0.05$  was considered statistically significant. The study was reviewed and  
141 deemed exempt from full review by the institutional review board.

142

143

144

145

146 **RESULTS**

147           There were 31,377 and 18,098 patients included in the 2019 comparative period  
 148 and 2020 pandemic period, respectively (Table 1). In the 2020 pandemic period, the mean  
 149 number of patients per week significantly declined versus the 2019 comparative period.  
 150 The 2020 pandemic period also had a significantly higher admission rate. There were no  
 151 differences in the percentage of patients who arrived on weekdays (Monday to Friday) in  
 152 the 2019 comparative period (73.4%) and 2020 (73.5%) pandemic period.

153

154 **Table 1:** Description of Emergency Department (ED) patients in the 2019 comparative  
 155 and 2020 pandemic period

|                                                          | 2019<br>(3/25/2019-<br>11/3/2019)<br>n=31,377 | 2020 P<br>(3/23/2020-<br>11/1/2020)<br>n=18,098 | Difference<br>(95% Confidence<br>Interval) | P value |
|----------------------------------------------------------|-----------------------------------------------|-------------------------------------------------|--------------------------------------------|---------|
| Mean Number of patients per week<br>(standard deviation) | 980.5                                         | 565.6                                           | 414.9                                      | <0.001  |
| Number of admissions (%)                                 | 3,805 (12.13%)                                | 2,867 (15.84%)                                  | 3.71% (3.07, 4.36)                         | <0.001  |
| Weekday arrivals (%)                                     | 23,042 (73.4%)                                | 13,297 (73.5%)                                  | 0.1% (-0.01, 0.01)                         | 0.93    |
| Weekend arrivals (%)                                     | 8,335 (26.6%)                                 | 4,801 (26.5)                                    | 0.1% (-0.01, 0.01)                         | 0.93    |
| Number (%) of Monday arrivals                            | 5,126 (16.34%)                                | 2,791 (15.42%)                                  | 0.92% (0.25, 1.58)                         | 0.007   |
| Number (%) of Tuesday arrivals                           | 4,699 (14.98%)                                | 2,665 (14.73%)                                  | 0.25% (-0.40, 0.9)                         | 0.45    |
| Number (%) of Wednesday arrivals                         | 4,577 (14.59%)                                | 2,637 (14.57%)                                  | 0.02% (-0.63, 0.66)                        | 0.96    |
| Number (%) of Thursday arrivals                          | 4,407 (14.05%)                                | 2,614 (14.44%)                                  | 0.4% (-1.04, 0.24)                         | 0.22    |
| Number (%) of Friday arrivals                            | 4,233 (13.49%)                                | 2,590 (14.31%)                                  | 0.82% (-1.46, -0.19)                       | 0.01    |
| Number (%) of Saturday arrivals                          | 4,055 (12.92%)                                | 2,362 (13.05%)                                  | 0.13% (-0.74, 0.49)                        | 0.68    |
| Number (%) of Sunday arrivals                            | 4,280 (13.64%)                                | 2,439 (13.48%)                                  | 0.16% (-0.46, 0.79)                        | 0.61    |
| Number (%) without a triage acuity<br>level assigned     | 55 (0.16%)                                    | 25 (0.14%)                                      | 0.03% (-0.04, 0.10)                        | 0.45    |

156

157           For the primary outcome, the mean number of ED visits on Monday was  
 158 significantly more than any other weekday in the 2019 comparative period or in aggregate  
 159 (Tuesday to Friday;  $p < 0.001$ ; Table 2). In contrast, there was not any significant difference  
 160 in the mean number of ED visits on Monday versus any other weekday during the 2020  
 161 pandemic period or in aggregate ( $p = 0.22$ ). The box plot of the number of visits on each  
 162 weekday is displayed graphically (Fig. 1).

163 **Table 2:** Mean number of all Emergency Department (ED) visits by weekday in both study  
 164 periods.

| Year | Weekday Period      | Mean (SD)<br>number of all<br>ED visits | Estimate of<br>Difference | 95% CI         | p      |
|------|---------------------|-----------------------------------------|---------------------------|----------------|--------|
| 2019 | Monday <sup>a</sup> | 160.2 (25.5)                            | -                         | -              | -      |
|      | Tuesday             | 146.8 (26.5)                            | -13.3                     | (-23.7, -3.0)  | 0.011  |
|      | Wednesday           | 143.0 (25.7)                            | -17.2                     | (-27.5, -6.8)  | 0.001  |
|      | Thursday            | 137.7 (24.7)                            | -22.5                     | (-32.8, -12.2) | <0.001 |
|      | Friday              | 132.3 (21.5)                            | -27.9                     | (-38.2, -17.6) | <0.001 |
|      | Tuesday to Friday   | 140.0 (25.0)                            | -20.2                     | (-28.5, -11.9) | <0.001 |
| 2020 | Monday <sup>a</sup> | 87.2 (16.8)                             | -                         | -              | -      |
|      | Tuesday             | 83.3 (17.6)                             | -3.9                      | (-14.2, 6.4)   | 0.45   |
|      | Wednesday           | 82.4 (19.2)                             | -4.8                      | (-15.1, 5.5)   | 0.36   |
|      | Thursday            | 81.7 (16.9)                             | -5.5                      | (-15.8, 4.8)   | 0.29   |
|      | Friday              | 80.9 (15.6)                             | -6.3                      | (-16.6, 4.0)   | 0.23   |
|      | Tuesday to Friday   | 82.1 (17.2)                             | -5.1                      | (-13.4, 3.1)   | 0.22   |

165 <sup>a</sup>Monday as reference Level

166 Abbreviations: CI (Confidence Interval), SD (Standard Deviation)

167

168 For the secondary analyses, 80 patients from the study periods did not have a  
 169 triage acuity assigned and the proportion of these unassigned patients did not vary  
 170 between periods. There was a significant difference in the distribution of ESI per day  
 171 between the ED visits in each study period, such that the likelihood of a greater proportion  
 172 of high (that is, sicker) acuity level patients was higher in 2020 than in 2019; this significant  
 173 difference ( $p < 0.001$ ) was present on the weekly levels (that is, all 7 days combined;  
 174  $p < 0.001$ ) and at the level of each individual day of the week ( $p < 0.001$ ) (Fig. 2).

175

## 176 DISCUSSION

177 In this single-center study, the historical increase in the relative number of ED  
 178 patient visits on Mondays was not seen during our pandemic lockdown period. The overall  
 179 number of ED visits was dramatically decreased in this pandemic period compared to a  
 180 seasonally comparative period in the prior year. The 14% relative increase in the  
 181 proportion of weekday visits on Mondays that we reported during the 2019 comparative



182 period, relative to other weekdays (i.e., Tuesday through Friday), was comparable to the  
183 12% to 17% relative increases reported in other ED studies.<sup>8-10</sup> We are unaware of any  
184 other ED studies that have reported this disappearance of the historical Monday effect  
185 associated with a pandemic lockdown period. One United Kingdom database study has  
186 reported that there is no longer an increase in the number of ED fracture visits presenting  
187 on weekends during the pandemic period as compared to a pre-pandemic period.<sup>14</sup>

188         During the pandemic, the greatest decrease in pediatric ED visits has been  
189 reported in communicable conditions (76% reduction) while non-infectious diagnoses have  
190 seen a smaller reduction of only 36%.<sup>15</sup> Given that 28% of U.S. pediatric emergency  
191 department diagnoses are related to infectious conditions, this dramatic decrease in  
192 overall ED volume is expected with children having fewer opportunities to spread  
193 contagious infections to one another while out of school and daycare during the periods of  
194 lockdown.<sup>16</sup> The specific decrease in the proportion of Monday ED visits, versus other  
195 weekdays, might be due to various factors and is potentially linked to the start of the  
196 workweek, as an Israeli ED study has reported Sunday (i.e., the first day of their traditional  
197 workweek) as the busiest day of ED visits.<sup>2</sup> One possibility is that part of the Monday  
198 increase has historically been attributed to the return of families from a weekend trip away  
199 who then seek care the following day.<sup>17</sup> With the lockdown period and its associated  
200 reductions in traveling, this effect might have been dampened.<sup>18</sup> Another contributor to the  
201 Monday effect has been attributed to the increased number of Monday referrals from  
202 primary care providers who return to the office after the weekend off. The significant  
203 decrease in primary care visits during the pandemic might have diminished this  
204 phenomenon as well.<sup>19</sup> Additionally, the pandemic's shift to the virtual workplace for many  
205 workers and the muddles schedules of each workday in the week might have also  
206 contributing to the decrease in this Monday effect. More workers are working from home or  
207 after-hours to afford flexibility in balancing their workload demands at-home virtual

208 schooling, job site closures, and other pandemic-related challenges.<sup>20</sup> The increase in the  
209 availability and access to virtual healthcare visits during the pandemic, as a more  
210 convenient source of care for caregivers, might have also contributed to the decrease in  
211 the Monday effect for ED visits.

212           Whether the explanation for this vanishing Monday effect is due to one or multiple  
213 factors, the trend has implications for appropriately scheduling ED staffing resources  
214 optimally, a goal with heightened importance in the face of pandemic-related staffing  
215 shortages.<sup>21</sup> The appropriate balancing of workloads across shifts is one strategy that  
216 might be effective in addressing the emotional burnout of healthcare providers in the  
217 pandemic.<sup>6</sup> With optimal staffing, both the mental health of workers as well as the financial  
218 health of an ED can be supported.<sup>7</sup> In our own ED, we typically scheduled an additional  
219 ED physician shift on Monday (as well as Tuesday) evenings, in addition to the other 35  
220 weekly shifts. These two shifts, early on in the week, represent an additional 5.7% of  
221 scheduled weekly physicians hours, which might be necessary during traditional periods  
222 but might be avoidable in the future if a similar, extended lockdown period occurs.

223           The absolute number of ED patients is only part of the equation when determining  
224 the staffing needs for an ED. In this study, we also saw a significant increase in the triage  
225 acuity of patients and an increase in our admission rates. Caring for higher acuity patients  
226 is associated with longer ED length of stay for each patient and can require more staffing  
227 per patient to match the increased resource utilization for this sicker population. Similar  
228 increases in acuity and admission rates have been described in other ED settings across  
229 the globe.<sup>15,22</sup> This higher proportion of high acuity patients has contributed to a decline in  
230 the performance of many traditional ED throughput measures of quality including longer  
231 length of stay, longer time to perform lab and radiological studies, and delayed time to  
232 antibiotic administration.<sup>23</sup>

233           This study had several limitations. First, as a single-center, pediatric ED, our  
234 findings might not be generalizable to other settings. Second, these findings might not be  
235 applicable to future pandemics or future surges within the current pandemic, as the various  
236 factors (e.g. the degree of school, daycare, and work closures) that impact this decrease  
237 might be present to differing degrees. Lastly, there were some missing data on the triage  
238 acuity level assignments; however this was a relatively small (<1%) proportion, and the  
239 proportion did not change between the two periods.

## 240 **CONCLUSIONS**

241           In conclusion, our ED visit volume no longer showed a significant increase in  
242 Monday visits compared to the other weekdays during this lockdown period of the COVID-  
243 19 pandemic. Future studies are needed to determine if this observed decrease in the  
244 Monday effect is present more widely using national database studies. If we can increase  
245 our understanding of the impact of societal factors, such as pandemic lockdown periods,  
246 on ED volumes, then we can continue to plan the judicious use of our limited ED  
247 resources.<sup>7</sup>

248 **Abbreviations:** ED (Emergency Department). Emergency Severity Index (ESI),  
249 Generalize Lineaer Model (GLM). Severe Acute Respiratory Syndrome Coronavirus  
250 (SARS-CoV-2)

251 **Ethical Approval:** This study was exempted from our institutional review board Human  
252 Subjects Research review (IRB #20-12-NH-0281)

253 **Competing Interests:** No authors have any financial or non-financial competing interests.

254 **Acknowledgement:** The authors thank Dr. Faiqa Qureshi, MD for her review and  
255 feedback on the manuscript.

256

257

## 258 REFERENCES

- 259 1. Sun Y, Heng BH, Seow YT, Seow E. Forecasting daily attendances at an emergency  
260 department to aid resource planning. *BMC Emerg Med.* 2009;9:1.
- 261 2. Rotstein Z, Wilf-Miron R, Lavi B, Shahar A, Gabbay U, Noy S. The dynamics of patient visits  
262 to a public hospital ED: a statistical model. *Am J Emerg Med.* 1997;15(6):596-599.
- 263 3. Haddadin Z, Blozinski A, Fernandez K, et al. Changes in Pediatric Emergency Department  
264 Visits During the COVID-19 Pandemic. *Hosp Pediatr.* 2021;11(4):e57-e60.
- 265 4. Pines JM, Zocchi MS, Black BS, et al. Characterizing pediatric emergency department visits  
266 during the COVID-19 pandemic. *Am J Emerg Med.* 2021;41:201-204.
- 267 5. DeLaroche AM, Rodean J, Aronson PL, et al. Pediatric Emergency Department Visits at US  
268 Children's Hospitals During the COVID-19 Pandemic. *Pediatrics.*  
269 2021;147(4):e2020039628.
- 270 6. Sharifi M, Asadi-Pooya AA, Mousavi-Roknabadi RS. Burnout among Healthcare Providers of  
271 COVID-19; a Systematic Review of Epidemiology and Recommendations. *Arch Acad Emerg  
272 Med.* 2021;9(1):e7.
- 273 7. Pines JM, Zocchi MS, Black BS, et al. The Effect of the COVID-19 Pandemic on the  
274 Economics of United States Emergency Care. *Ann Emerg Med.* 2021;78(4):487-499.
- 275 8. Erkamp NS, van Dalen DH, de Vries E. Predicting emergency department visits in a large  
276 teaching hospital. *Int J Emerg Med.* 2021;14(1):34.
- 277 9. Castner J, Yin Y, Loomis D, Hewner S. Medical Mondays: ED Utilization for Medicaid  
278 Recipients Depends on the Day of the Week, Season, and Holidays. *J Emerg Nurs.*  
279 2016;42(4):317-324.
- 280 10. McHale P, Wood S, Hughes K, Bellis MA, Demnitz U, Wyke S. Who uses emergency  
281 departments inappropriately and when - a national cross-sectional study using a  
282 monitoring data system. *BMC Med.* 2013;11(1):258.
- 283 11. Vandembroucke JP, von Elm E, Altman DG, et al. Strengthening the Reporting of  
284 Observational Studies in Epidemiology (STROBE): explanation and elaboration. *Int J Surg.*  
285 2014;12(12):1500-1524.
- 286 12. Documenting Virginia's path to recovery from the coronavirus (COVID-19) pandemic,  
287 2020-2021 - Ballotpedia. Accessed January 20, 2022.  
288 [https://ballotpedia.org/Documenting\\_Virginia%27s\\_path\\_to\\_recovery\\_from\\_the\\_coronavirus\\_\(COVID-19\)\\_pandemic,\\_2020-2021](https://ballotpedia.org/Documenting_Virginia%27s_path_to_recovery_from_the_coronavirus_(COVID-19)_pandemic,_2020-2021)  
289
- 290 13. COVID-19 pandemic in Virginia. In: *Wikipedia.* ; 2022. Accessed January 20, 2022.  
291 [https://en.wikipedia.org/w/index.php?title=COVID-  
292 19\\_pandemic\\_in\\_Virginia&oldid=1064752543](https://en.wikipedia.org/w/index.php?title=COVID-19_pandemic_in_Virginia&oldid=1064752543)
- 293 14. Ferraro CF, Findlater L, Morbey R, et al. Describing the indirect impact of COVID-19 on  
294 healthcare utilisation using syndromic surveillance systems. *BMC Public Health.*  
295 2021;21:2019.

- 296 15. Kruizinga MD, Peeters D, van Veen M, et al. The impact of lockdown on pediatric ED visits  
297 and hospital admissions during the COVID19 pandemic: a multicenter analysis and review  
298 of the literature. *Eur J Pediatr*. 2021;180(7):2271-2279.
- 299 16. Hasegawa K, Tsugawa Y, Cohen A, Camargo CA. Infectious Disease-related Emergency  
300 Department Visits Among Children in the US. *Pediatr Infect Dis J*. 2015;34(7):681-685.
- 301 17. Wargon M, Guidet B, Hoang TD, Hejblum G. A systematic review of models for forecasting  
302 the number of emergency department visits. *Emerg Med J*. 2009;26(6):395-399.
- 303 18. Abdullah M, Dias C, Muley D, Shahin Md. Exploring the impacts of COVID-19 on travel  
304 behavior and mode preferences. *Transportation Research Interdisciplinary Perspectives*.  
305 2020;8:100255.
- 306 19. Chatterji P, Li Y. Effects of the COVID-19 Pandemic on Outpatient Providers in the United  
307 States. *Med Care*. 2021;59(1):58-61.
- 308 20. Dunatchik A, Gerson K, Glass J, Jacobs JA, Stritzel H. Gender, Parenting, and The Rise of  
309 Remote Work During the Pandemic: Implications for Domestic Inequality in the United  
310 States. *Gender & Society*. 2021;35(2):194-205.
- 311 21. CDC. Healthcare Workers. Centers for Disease Control and Prevention. Published February  
312 11, 2020. Accessed January 20, 2022. <https://www.cdc.gov/coronavirus/2019-ncov/hcp/mitigating-staff-shortages.html>
- 314 22. Finkelstein Y, Maguire B, Zemek R, et al. Effect of the COVID-19 Pandemic on Patient  
315 Volumes, Acuity, and Outcomes in Pediatric Emergency Departments: A Nationwide Study.  
316 *Pediatr Emerg Care*. 2021;37(8):427-434.
- 317 23. Bae SJ, Chung HS, Namgung M, Choi YH, Min JH, Lee DH. Comparison of the Clinical  
318 Process and Outcomes in Patients after Coronavirus Infection 2019 Outbreak. *Medicina*  
319 (*Kaunas*). 2021;57(10):1086.
- 320

**Fig. 1:** Box plot of the number of visits by day of the week during the pandemic period (3/23/2020-11/1/2020) and comparative period (3/25/2019-11/3/2019).

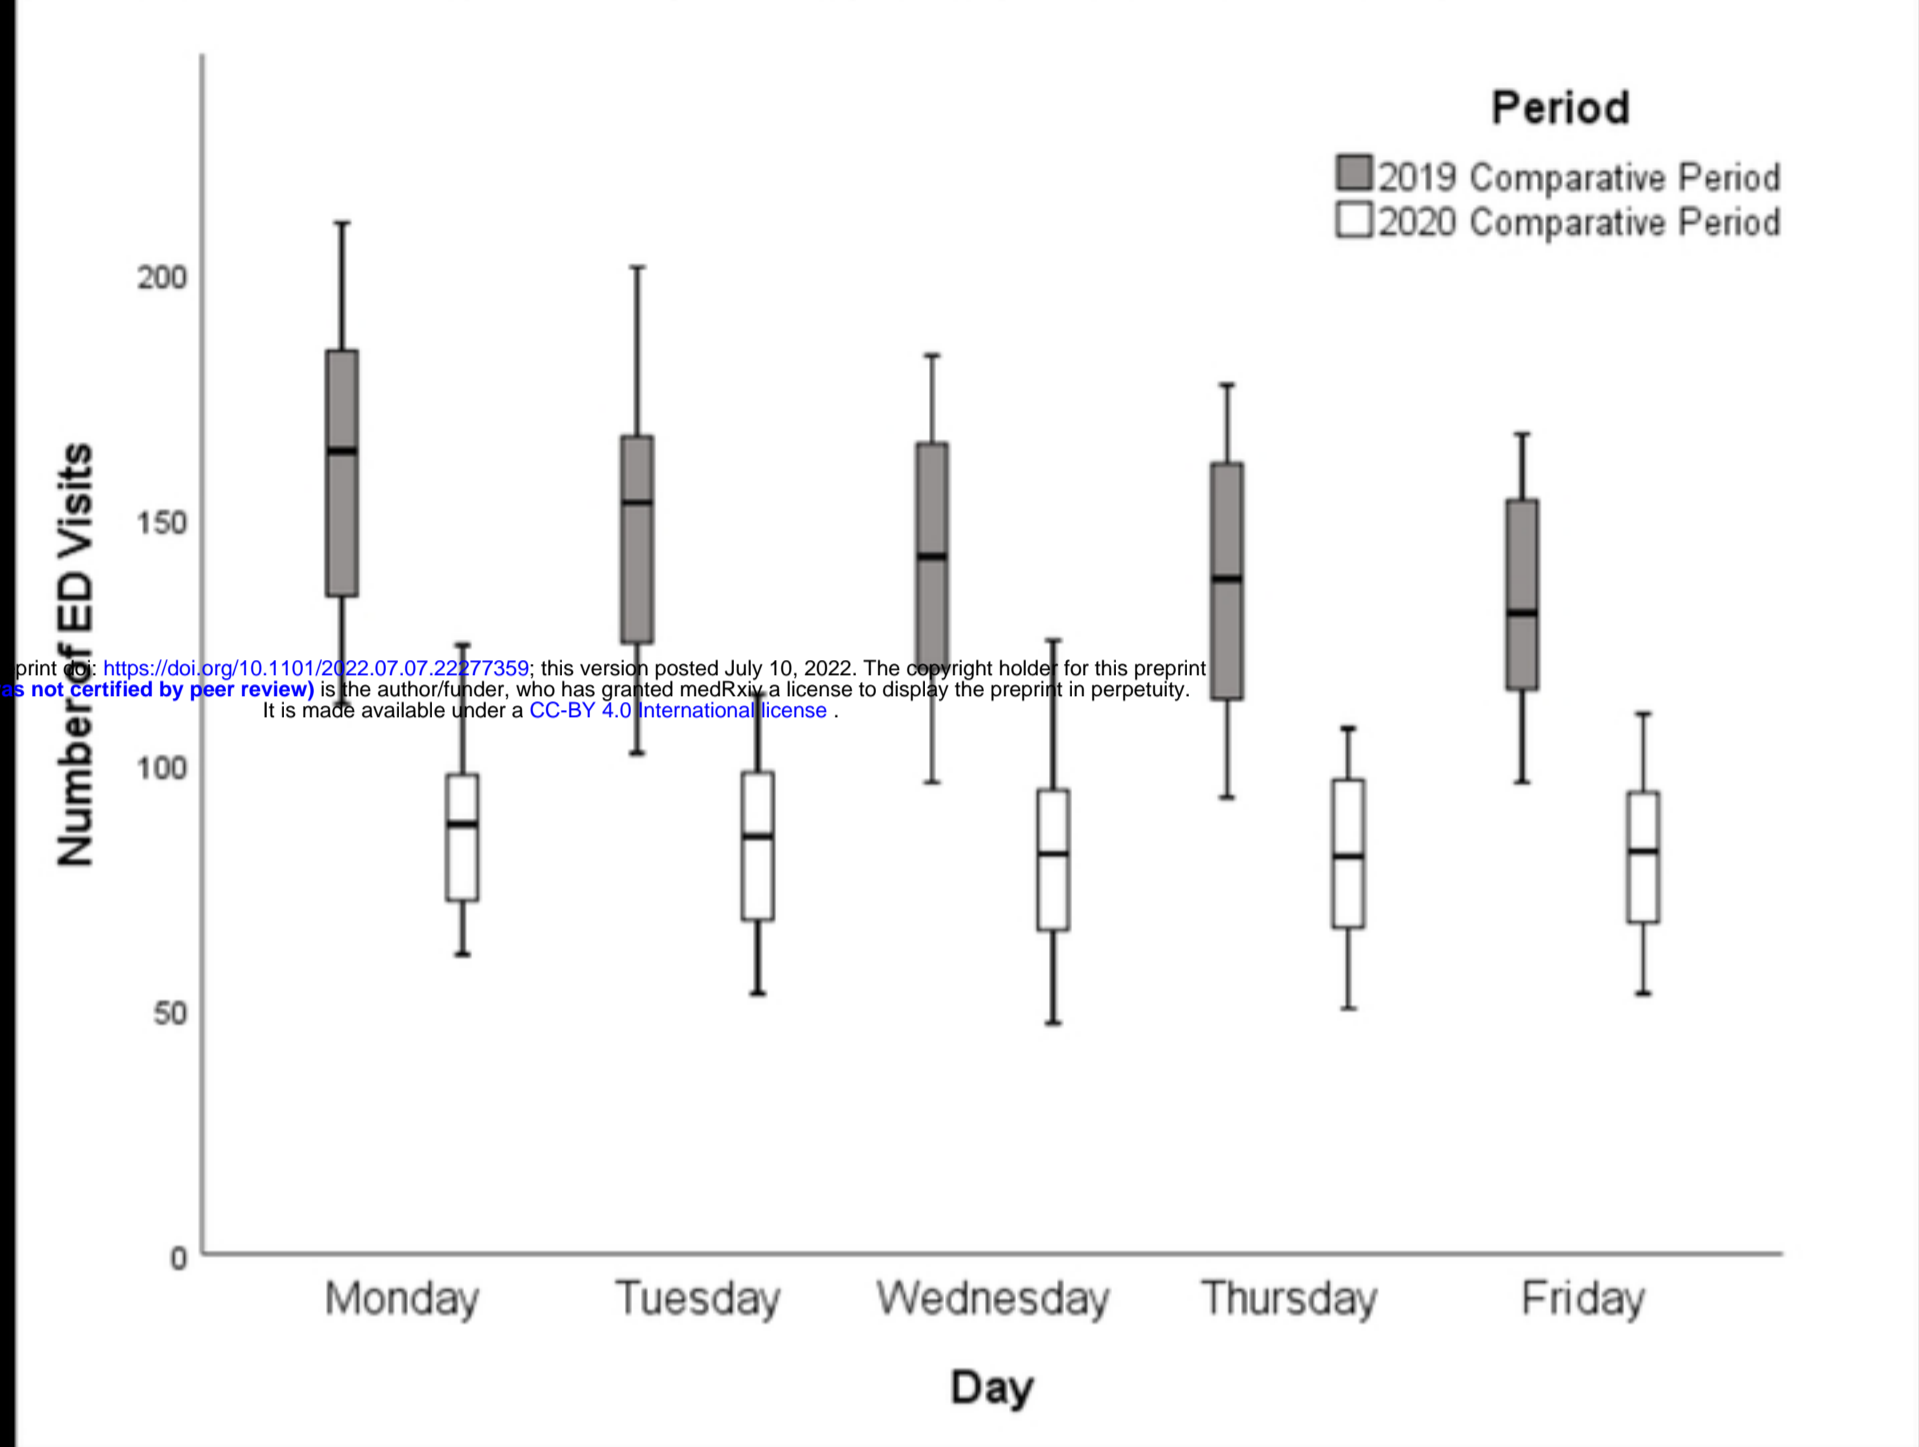

print doi: <https://doi.org/10.1101/2022.07.07.22277359>; this version posted July 10, 2022. The copyright holder for this preprint (which was not certified by peer review) is the author/funder, who has granted medRxiv a license to display the preprint in perpetuity. It is made available under a [CC-BY 4.0 International license](https://creativecommons.org/licenses/by/4.0/).

Fig. 2: Histogram of the proportion of emergency department patients seen in each Emergency Severity Index (ESI) triage level, according to the day of week in the 2019 comparative period (3/25/2019-11/3/2019) and the 2020 pandemic (3/23/2020-11/1/2020) period.

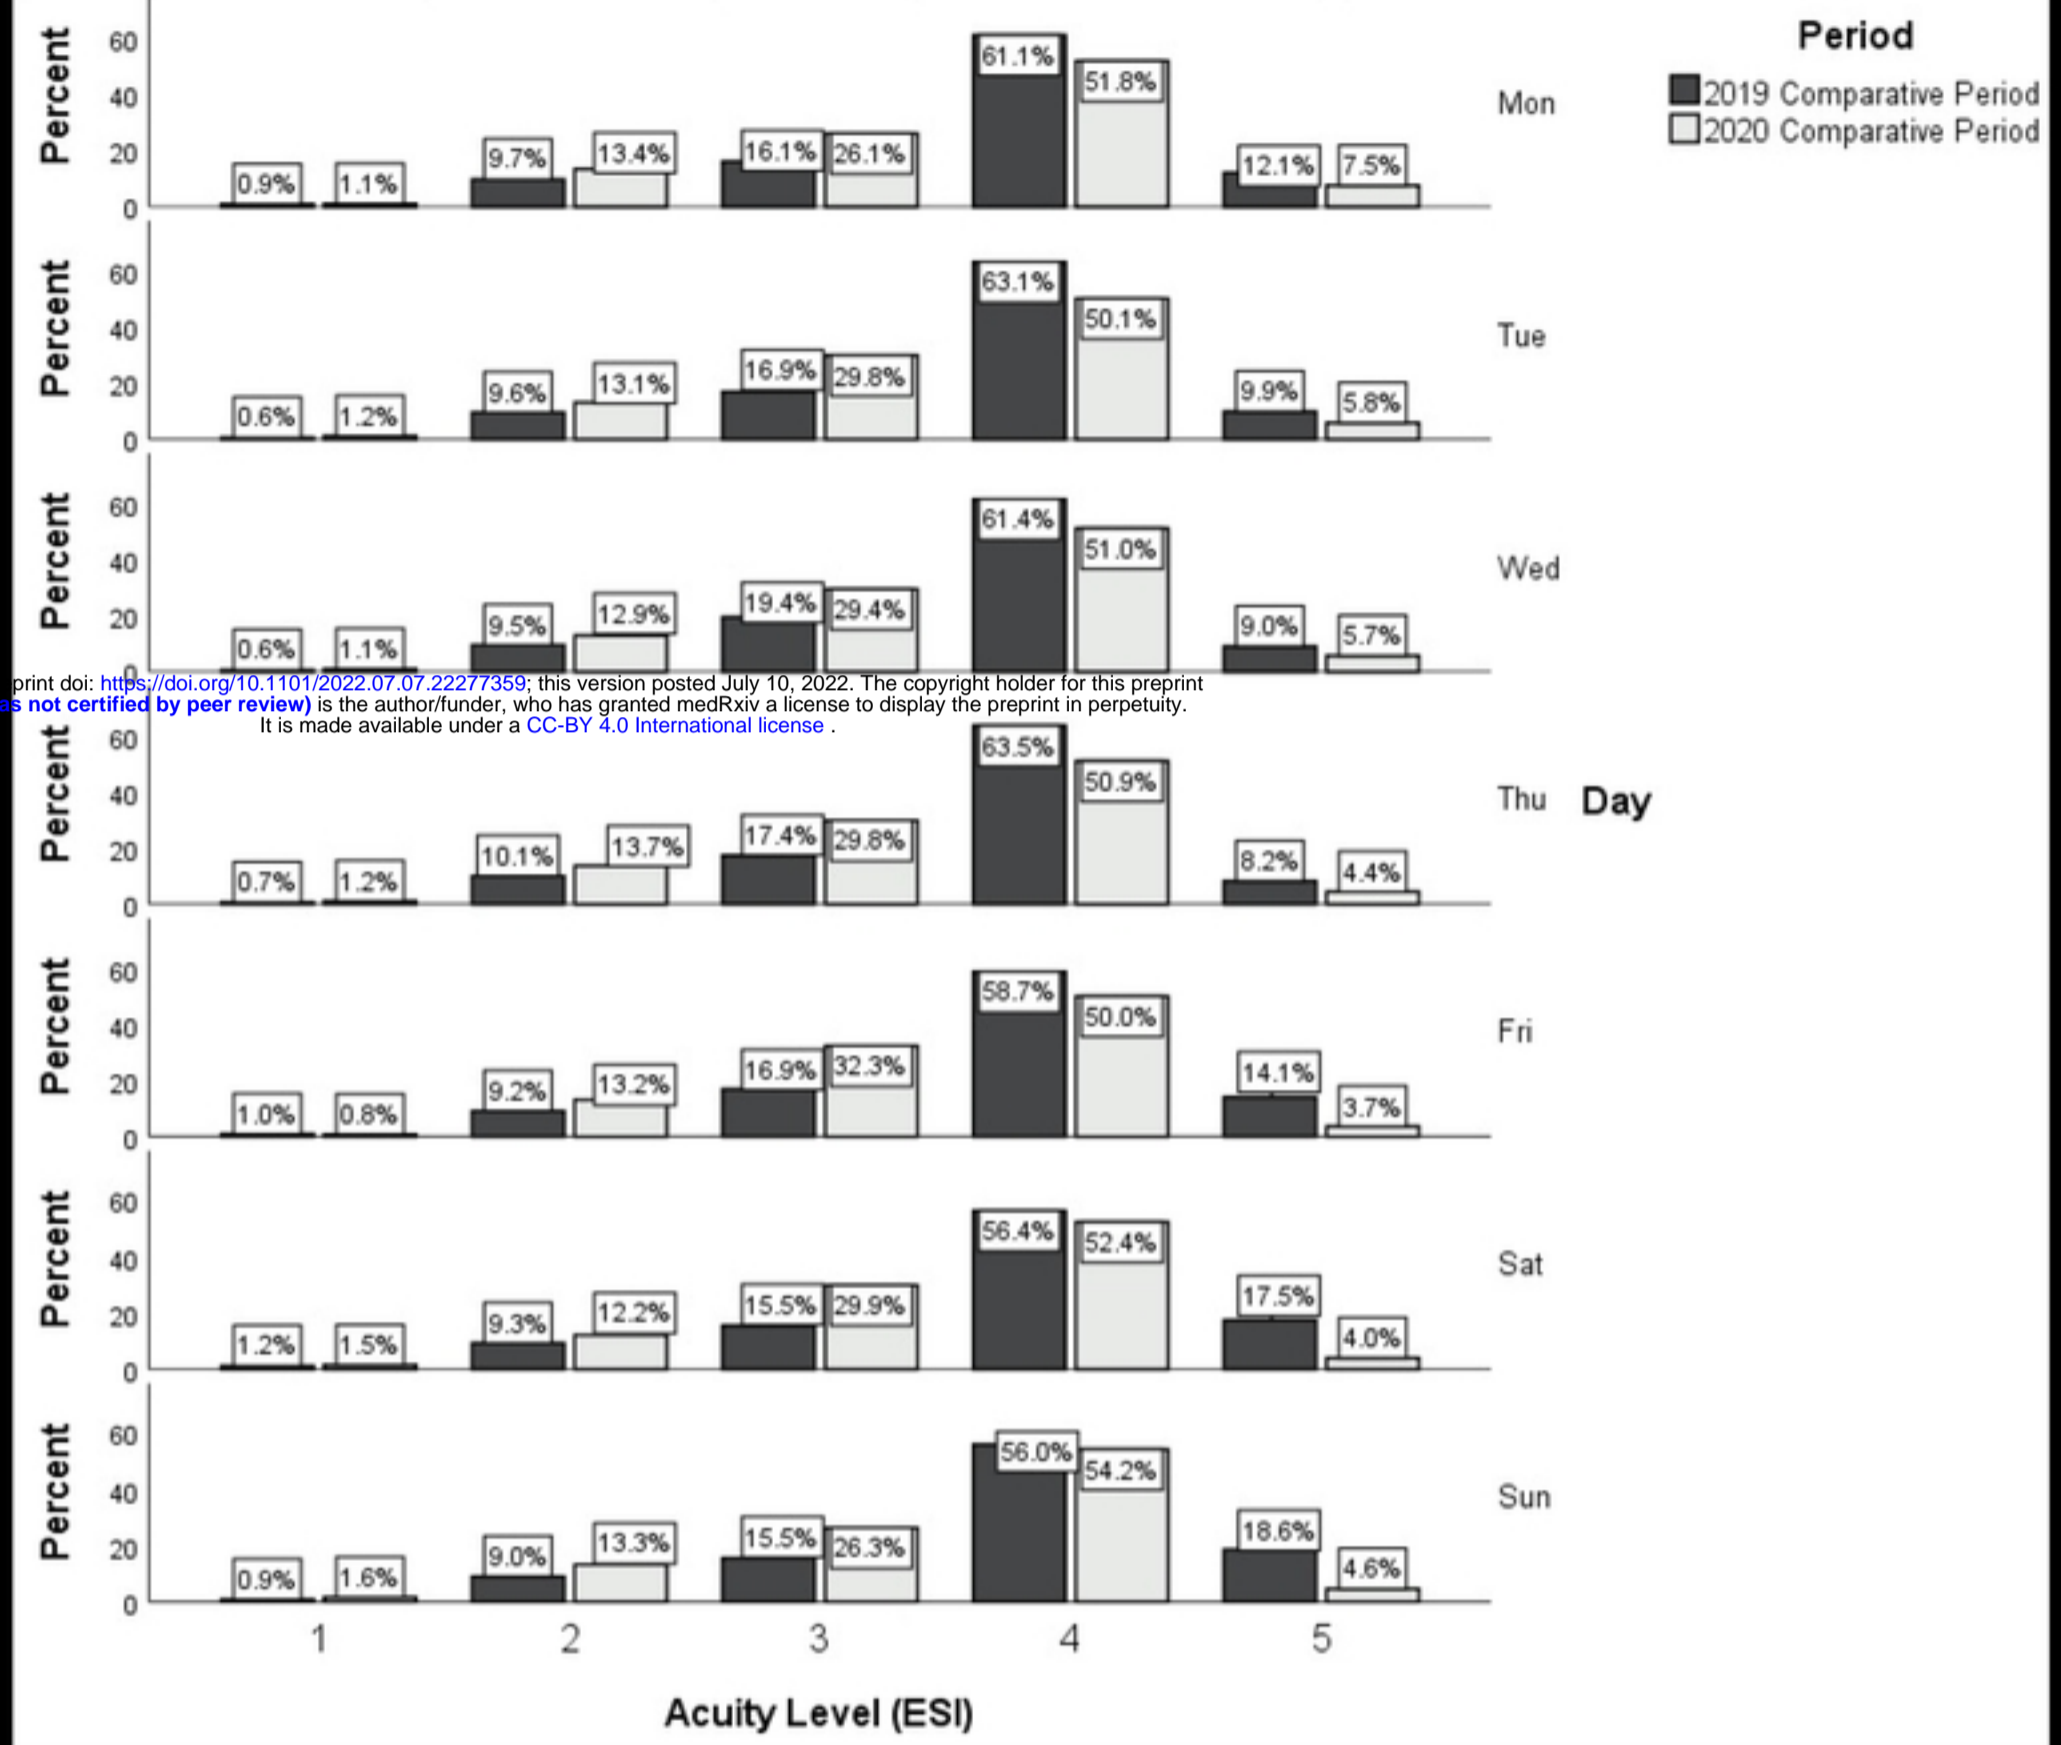

Figure 2
